# Supplementary material for: Tuning Co/Ni Ratio in Co–Ni Bimetallic Hybrid for Electrochemical Detection of Glucose
Source: MDPI journal article supplement (doi:10.3390/chemosensors12030038), 2024-03-04
Supplement: s1 [file s1]

## **Supplementary Information**

### **Tuning Co/Ni ratio in Co-Ni bimetallic hybrid for electrochemical detection of glucose**

Junyi Zeng<sup>1</sup>, Yanting Yang<sup>2</sup>, Xiaoyu Lei<sup>1</sup>, Jinan Deng<sup>1\*</sup>, Ning Hu<sup>1\*</sup> and Jun Yang<sup>1\*</sup>

<sup>1</sup> Key Laboratory of Biorheological Science and Technology, Ministry of Education and Bioengineering College, Chongqing University, Chongqing 400044, China

<sup>2</sup> College of Animal Science and Technology, Southwest University, Chongqing 402460, China.

\*Corresponding authors:

biojdeng@cqu.edu.cn (J. Deng)

huning@cqu.edu.cn (N.Hu)

bioyangjun@cqu.edu.cn (J. Yang)

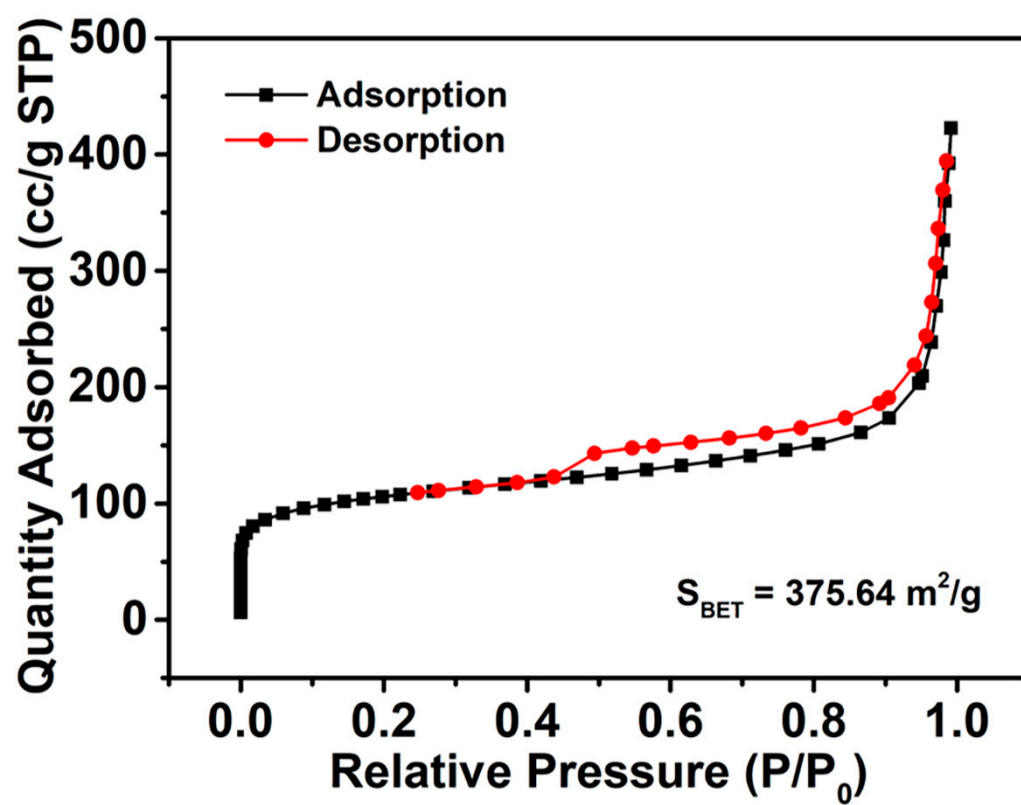

Figure S1. N<sub>2</sub> adsorption/desorption isotherm of Co<sub>1</sub>Ni<sub>1</sub>/N-C hybrid.

**Table S1** Specific surface areas of hybrids calculated by BET method

| Hybrid                               | S <sub>BET</sub> (m <sup>2</sup> /g) |
|--------------------------------------|--------------------------------------|
| Co/N-C                               | 233.45                               |
| Co <sub>3</sub> Ni <sub>1</sub> /N-C | 235.45                               |
| Co <sub>1</sub> Ni <sub>1</sub> /N-C | 375.64                               |
| Co <sub>1</sub> Ni <sub>3</sub> /N-C | 309.37                               |
| Ni/N-C                               | 314.64                               |

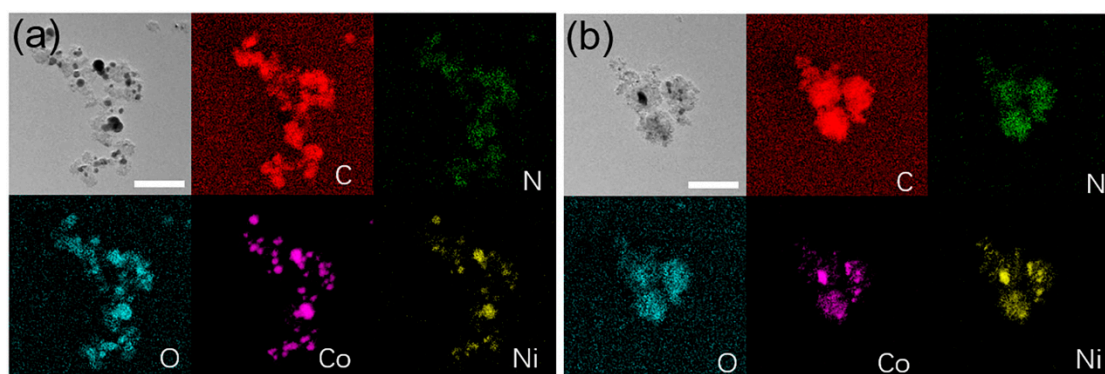

**Figure S2.** The TEM images and the corresponding elemental mapping images of (a)  $\text{Co}_3\text{Ni}_1/\text{N-C}$  and (b)  $\text{Co}_1\text{Ni}_3/\text{N-C}$  hybrids for C, N, O, Co, and Ni. The scale bar is 500 nm

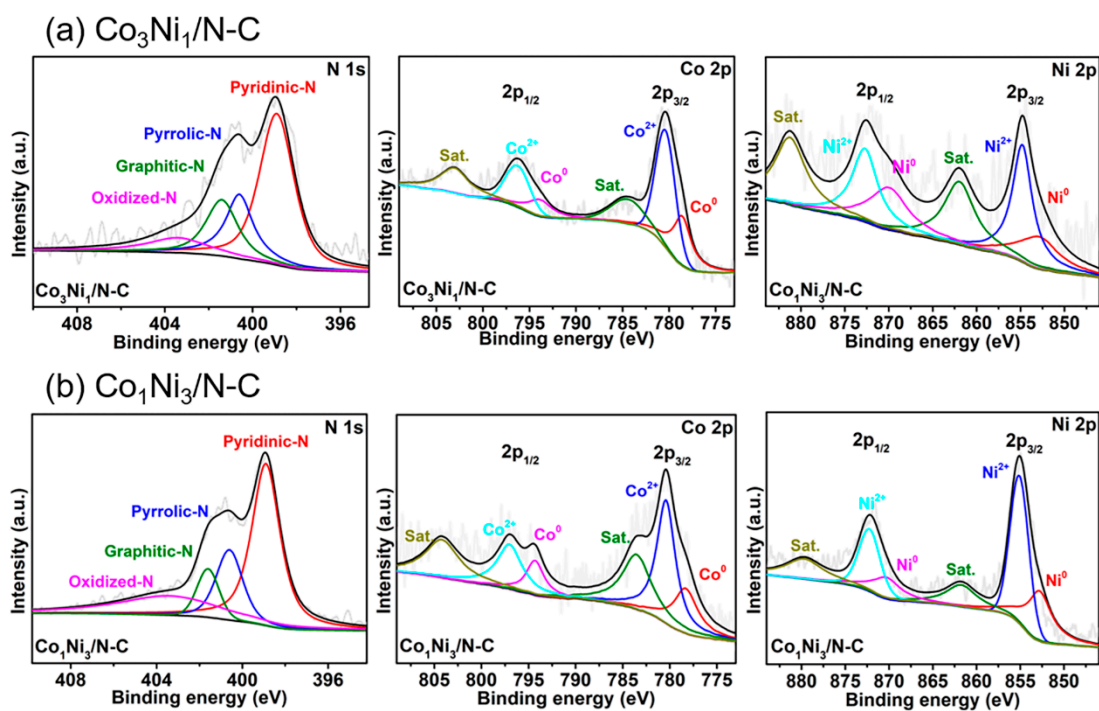

**Figure S3.** XPS spectra of C 1s, N 1s, Co 2p, and Ni 2p for (a)  $\text{Co}_3\text{Ni}_1/\text{N-C}$  and (b)  $\text{Co}_1\text{Ni}_3/\text{N-C}$  hybrids

**Table S2.** N contents calculated from XPS spectra

| Hybrid                               | Pyridinic N (%) | Pyrrolic N (%) | Graphitic N (%) | Oxidized N (%) |
|--------------------------------------|-----------------|----------------|-----------------|----------------|
| Co/N-C                               | 49.0            | 19.3           | 19.6            | 12.1           |
| Co <sub>3</sub> Ni <sub>1</sub> /N-C | 51.2            | 20.2           | 18.8            | 9.8            |
| Co <sub>1</sub> Ni <sub>1</sub> /N-C | 50.8            | 21.3           | 15.4            | 12.5           |
| Co <sub>1</sub> Ni <sub>3</sub> /N-C | 51.0            | 19.1           | 10.0            | 19.9           |
| Ni/N-C                               | 42.5            | 27.0           | 19.4            | 11.1           |

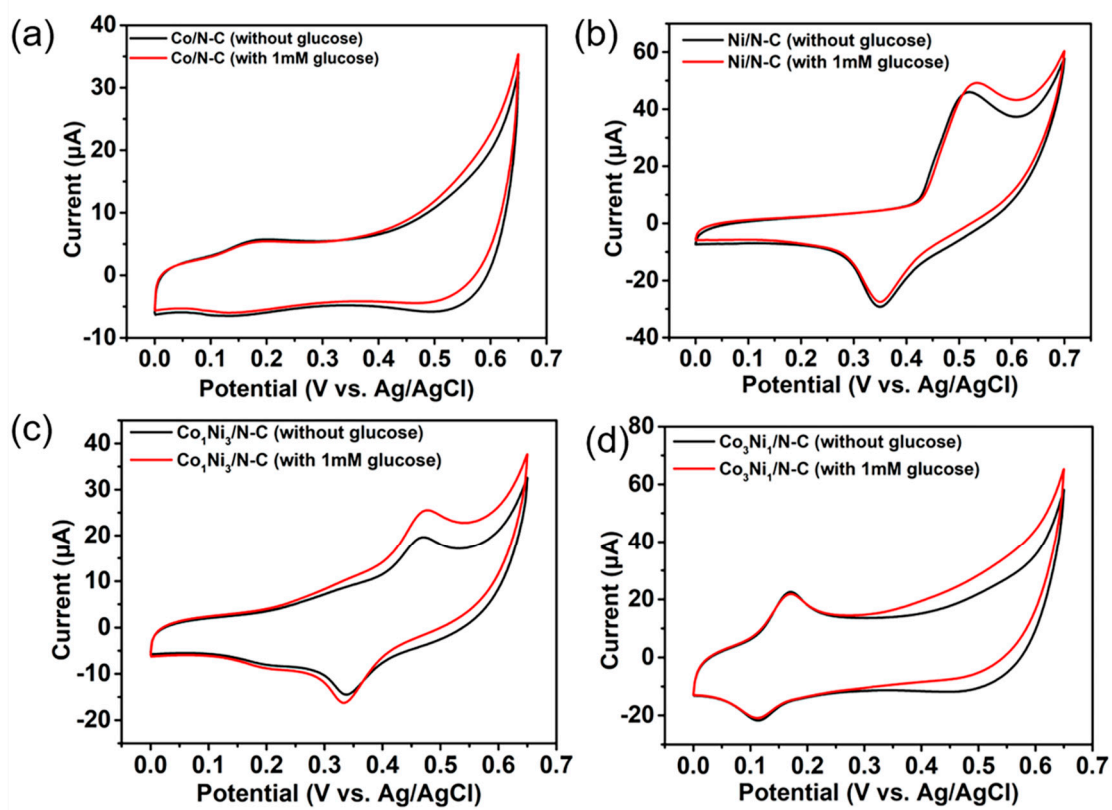

**Figure S4.** CV curves of SPEs modified with (a) Co/N-C, (b) Ni/N-C, (c) Co<sub>1</sub>Ni<sub>3</sub>/N-C, and (d) Co<sub>3</sub>Ni<sub>1</sub>/N-C hybrids in 0.1 M NaOH aqueous solution in the absence and presence of 1 mM glucose at a scan rate of 50 mV·s<sup>-1</sup>.

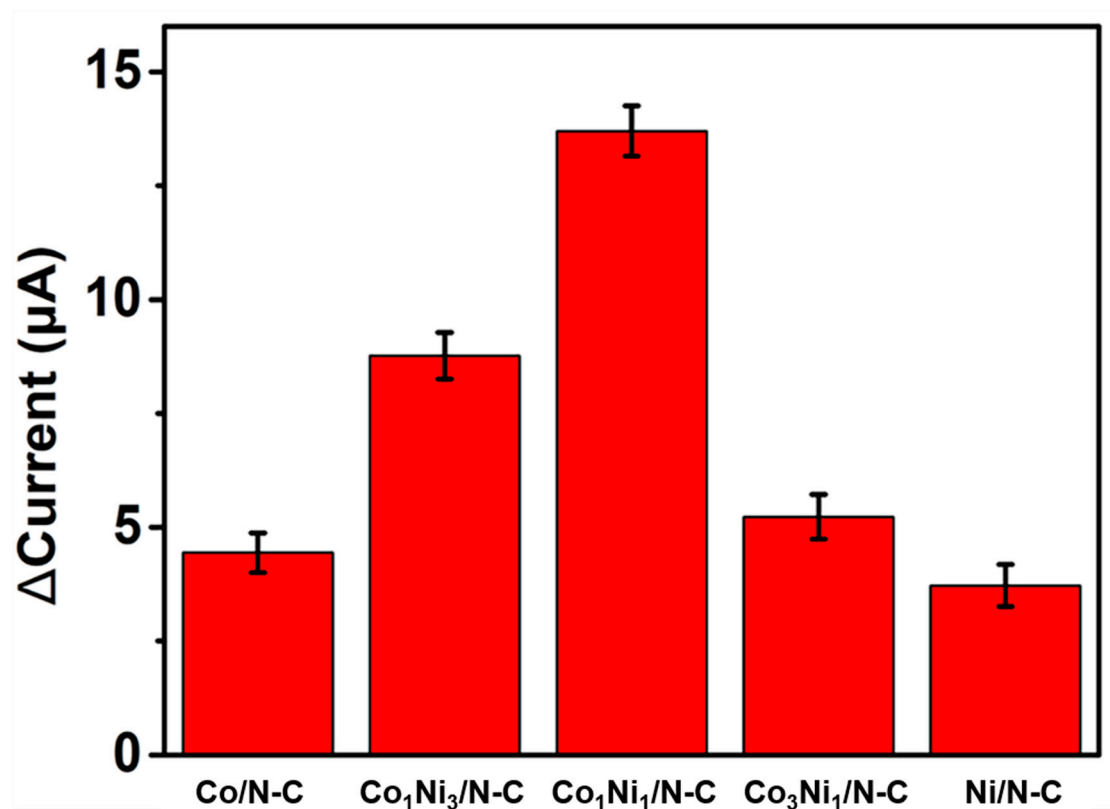

**Figure S5.** The current increment extracted from the CVs of hybrid-modified SPEs with different Co/Ni ratios at 0.6 V in presence of 1 mM glucose at a scan rate of 50  $\text{mV}\cdot\text{s}^{-1}$ .



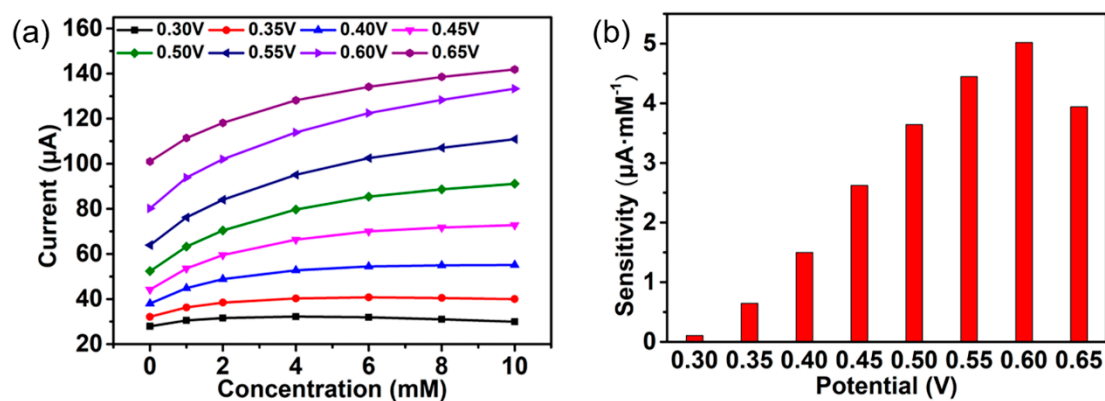

**Figure S6.** Current response of  $\text{CO}_1\text{Ni}_1/\text{N-C}$ -modified SPE as a function of glucose concentration in 0.1 NaOH aqueous solution at various applied potentials (a) and the corresponding sensitivity at different applied potentials (b).

**Table S3** Comparison of the sensing performance of Co<sub>1</sub>Ni<sub>1</sub>/N-C hybrid-modified SPE prepared in this work with other non-enzymatic glucose sensors

| Electrode                                   | Sensitivity<br>( $\mu\text{A} \cdot \text{mM}^{-1} \cdot \text{cm}^{-2}$ ) | Electrolyte   | Linear range                                       | LOD<br>( $\mu\text{M}$ ) | Ref.         |
|---------------------------------------------|----------------------------------------------------------------------------|---------------|----------------------------------------------------|--------------------------|--------------|
| NiCo <sub>2</sub> O <sub>4</sub> /N-rGO     | 3210                                                                       | 0.1 M<br>KOH  | 15 $\mu\text{M}$ –2.55 mM                          | 0.18                     | [1]          |
| NiCo/C                                      | 265                                                                        | 0.1 M<br>NaOH | 0.5 $\mu\text{M}$ –4.38 mM                         | 0.2                      | [2]          |
| NiO-NiCo <sub>2</sub> O <sub>4</sub> /C     | 340.4<br>56.1                                                              | 0.1 M<br>NaOH | 0.1 $\mu\text{M}$ –600 $\mu\text{M}$<br>0.9–6.3 mM | 0.03                     | [3]          |
| NiCo <sub>2</sub> O <sub>4</sub> nanosphere | 1917<br>703                                                                | 0.2 M<br>NaOH | 0.01–0.30 mM,<br>0.3–2.24 mM                       | 0.6                      | [4]          |
| NiCo <sub>2</sub> O <sub>4</sub> nanorods   | 1685                                                                       | 0.1 M<br>NaOH | 0.1 $\mu\text{M}$ –1.0 mM                          | 0.16                     | [5]          |
| Ni/Co(HHTP)MOF/CC                           | 3250                                                                       | 0.1 M<br>NaOH | 0.3 $\mu\text{M}$ –2.312 mM                        | 0.1                      | [6]          |
| NiCo LDH                                    | 30.59                                                                      | 0.1 M<br>NaOH | 5–25 mM                                            | 530                      | [7]          |
| Ni-Co<br>MOF/Ag/rGO/PU                      | 425.9                                                                      | 0.1 M<br>NaOH | 10 $\mu\text{M}$ –0.66mM                           | 3.28                     | [8]          |
| NiCo-LDH                                    | 4600                                                                       | 0.1 M<br>NaOH | Up to 2.5 mM                                       | 0.2                      | [9]          |
| NiCo-MOF nanosheets                         | 684.4                                                                      | 0.1 M<br>NaOH | 1 $\mu\text{M}$ –8 mM                              | 0.29                     | [10]         |
| Co <sub>1</sub> Ni <sub>1</sub> /N-C        | 1041.7<br>75.7                                                             | 0.1 M<br>NaOH | 0.5 $\mu\text{M}$ –1 mM<br>1–10 mM                 | 0.11                     | This<br>work |

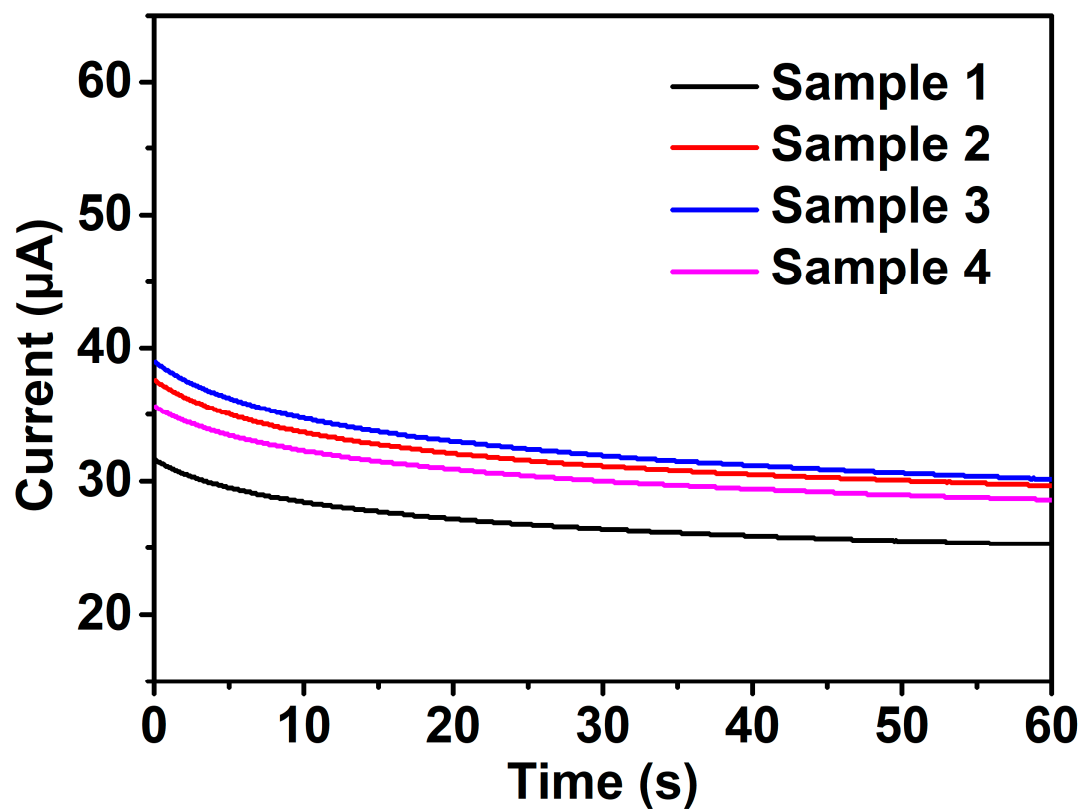

**Figure S7.** Amperometric response of CO<sub>1</sub>Ni<sub>1</sub>/N-C hybrid-modified SPE for glucose determination using serum samples.

## References

1. Sheng, Q.; Liu, D.; Zheng, J. NiCo alloy nanoparticles anchored on polypyrrole/reduced graphene oxide nanocomposites for nonenzymatic glucose sensing. *New J. Chem.* **2016**, *40*, 6658-6665. <https://doi.org/10.1039/c6nj01264g>
2. Wang, L.; Hou, C.; Yu, H.; Zhang, Q.; Li, Y.; Wang, H. Metal-organic framework-derived nickel/cobalt-based nanohybrids for sensing non-enzymatic glucose. *ChemElectroChem* **2020**, *7*, 4446-4452. <https://doi.org/10.1002/celec.202001135>
3. Wang, L.; Yu, H.; Zhang, Q.; Li, Y.; Jia, W.; Hou, C.; Wang, H. NiCo-niCoO<sub>2</sub>/carbon hollow nanocages for non-enzyme glucose detection. *Electrochim. Acta* **2021**, *381*, 138259. <https://doi.org/10.1016/j.electacta.2021.138259>
4. Huang, W.; Cao, Y.; Chen, Y.; Peng, J.; Lai, X.; Tu, J. Fast synthesis of porous NiCo<sub>2</sub>O<sub>4</sub> hollow nanospheres for a high-sensitivity non-enzymatic glucose sensor. *Appl. Surf. Sci.* **2017**, *396*, 804-811. <https://doi.org/10.1016/j.apsusc.2016.11.034>
5. Yang, J.; Cho, M.; Lee, Y. Synthesis of hierarchical NiCo<sub>2</sub>O<sub>4</sub> hollow nanorods via sacrificial-template accelerate hydrolysis for electrochemical glucose oxidation. *Biosens. Bioelectron.* **2016**, *75*, 15-22. <https://doi.org/10.1016/j.bios.2015.08.008>
6. Xu, Z.; Wang, Q.; Zhangsun, H.; Zhao, S.; Zhao, Y.; Wang, L. Carbon cloth-supported nanorod-like conductive Ni/Co bimetal MOF: A stable and high-performance enzyme-free electrochemical sensor for determination of glucose in serum and beverage. *Food Chem.* **2021**, *349*, 129202. <https://doi.org/10.1016/j.foodchem.2021.129202>
7. Wu, Y. T.; Tsao, P. K.; Chen, K. J.; Lin, Y. C.; Aulia, S.; Chang, L. Y.; Ho, K. C.; Chang, C. Y.; Mizuguchi, H.; Yeh, M. H. Designing bimetallic Ni-based layered double hydroxides for enzyme-free electrochemical lactate biosensors. *Sens. Actuators B Chem.* **2021**, *346*, 130505. <https://doi.org/10.1016/j.snb.2021.130505>
8. Shu, Y.; Su, T.; Lu, Q.; Shang, Z.; Xu, Q.; Hu, X. Highly stretchable wearable electrochemical sensor based on Ni-Co MOF nanosheet-decorated Ag/RGO/Pu fiber for continuous sweat glucose detection. *Anal. Chem.* **2021**, *93*, 16222-16230. <https://doi.org/10.1021/acs.analchem.1c04106>
9. Amin, K. M.; Muench, F.; Kunz, U.; Ensinger, W. 3D NiCo-layered double hydroxide@Ni nanotube networks as integrated free-standing electrodes for nonenzymatic glucose sensing. *J. Colloid Interface Sci.* **2021**, *591*, 384-395. <https://doi.org/10.1016/j.jcis.2021.02.023>
10. Li, W.; Lv, S.; Wang, Y.; Zhang, L.; Cui, X. Nanoporous gold induced vertically standing 2D NiCo bimetal-organic framework nanosheets for non-enzymatic glucose biosensing. *Sens. Actuators B Chem.* **2019**, *281*, 652-658. <https://doi.org/10.1016/j.snb.2018.10.150>
